# Supplementary material for: Silent gene clusters encode magnetic organelle biosynthesis in a non-magnetotactic phototrophic bacterium
Source: PubMed Central journal article supplement (PMC9938234; doi:10.1038/s41396-022-01348-y), 2022-12-14
Supplement: 41396_2022_1348_MOESM5_ESM.pdf [file 41396_2022_1348_MOESM5_ESM.pdf]

- Positive Stranded CDS
- Negative Stranded CDS
- tRNA
- rRNA
- Other RNA
- GC Content
- GC skew +
- GC skew -
- Transposases

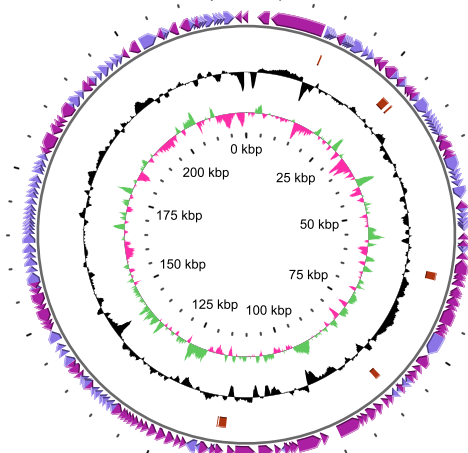

**pRHOApa (220.1 kbp)**

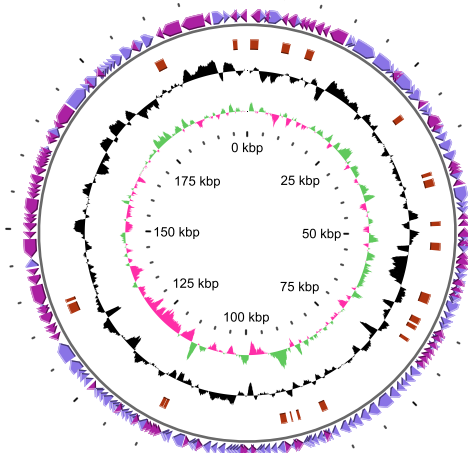

**pRHOApb (199.2 kbp)**

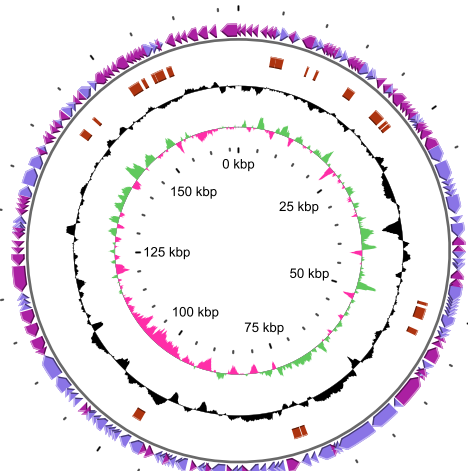

**pRHOApc (167.3 kbp)**

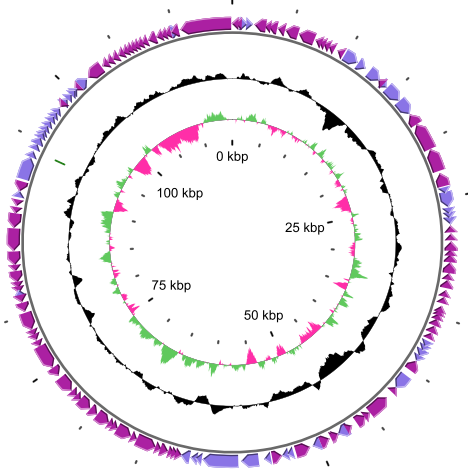

**pRHOApd (114.9 kbp)**

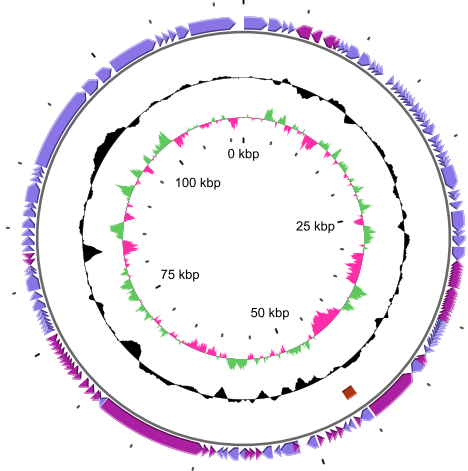

**pRHOApe (112.3 kbp)**

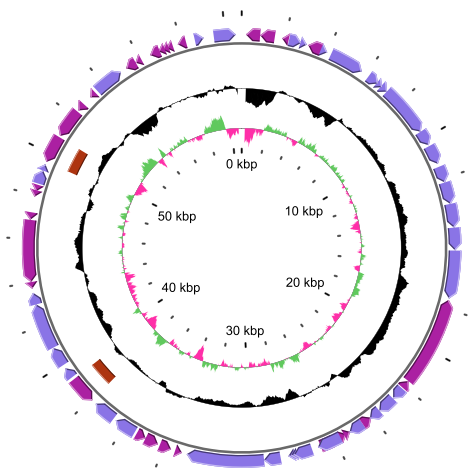

**pRHOApf (60.8 kbp)**

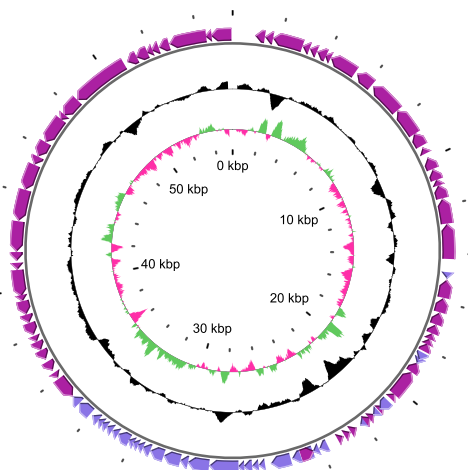

**pRHOApg (55.5 kbp)**

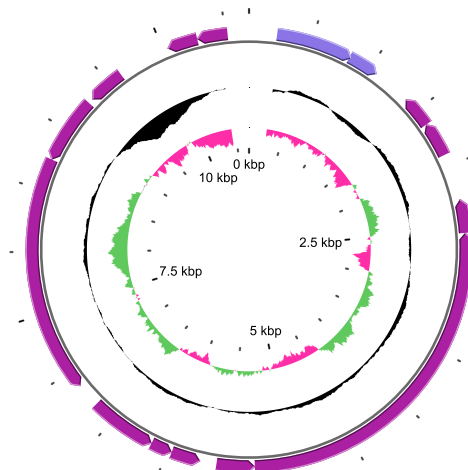

**pRHOAph (10.7 kbp)**
