# Supplementary material for: Silent gene clusters encode magnetic organelle biosynthesis in a non-magnetotactic phototrophic bacterium
Source: PubMed Central journal article supplement (PMC9938234; doi:10.1038/s41396-022-01348-y), 2022-12-14
Supplement: 41396_2022_1348_MOESM9_ESM.pdf [file 41396_2022_1348_MOESM9_ESM.pdf]

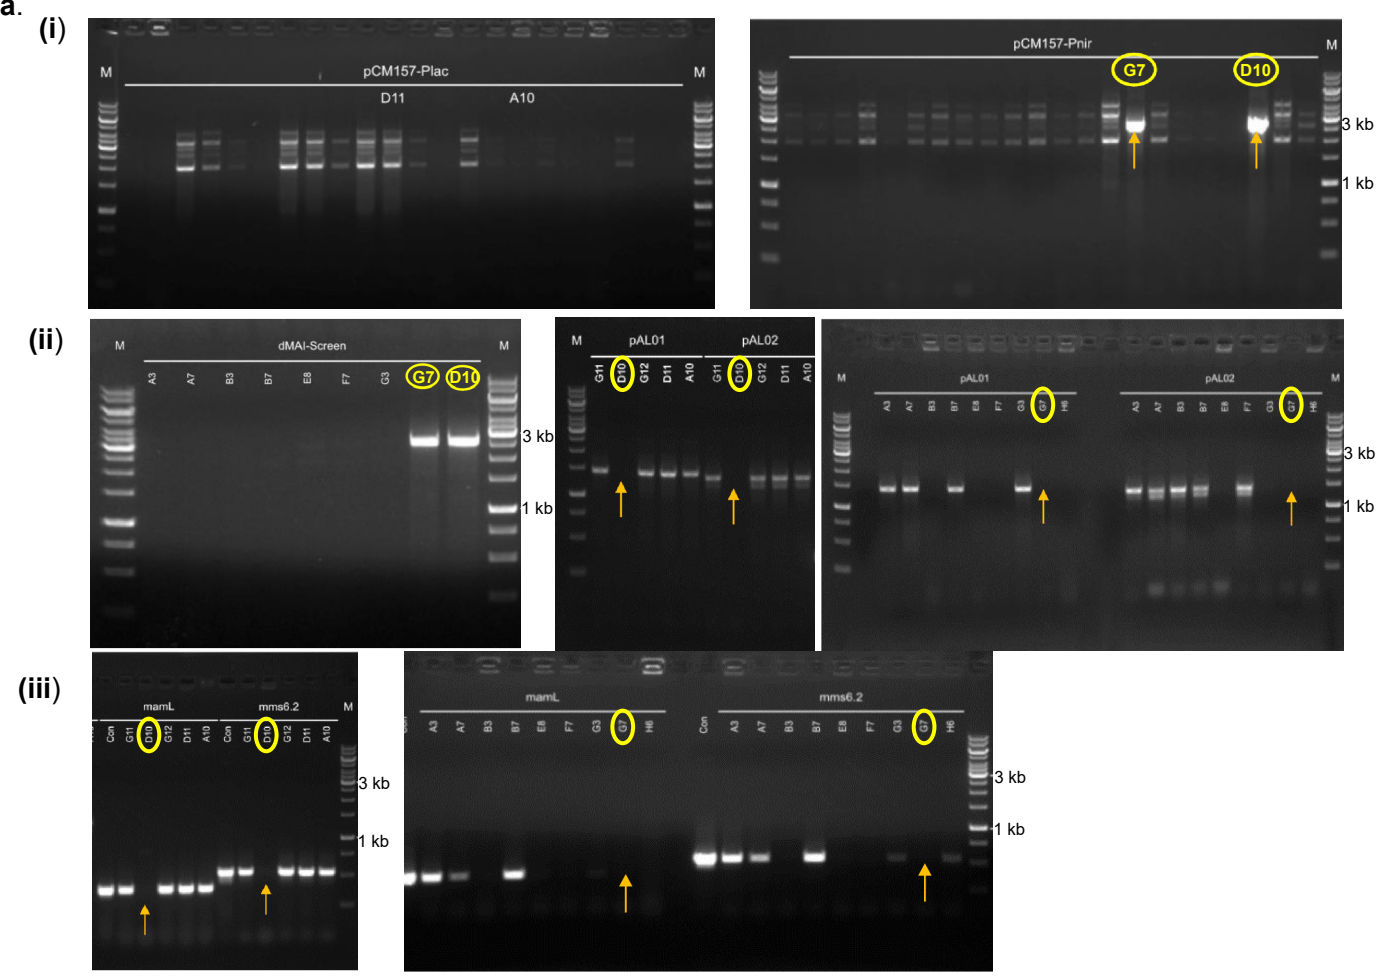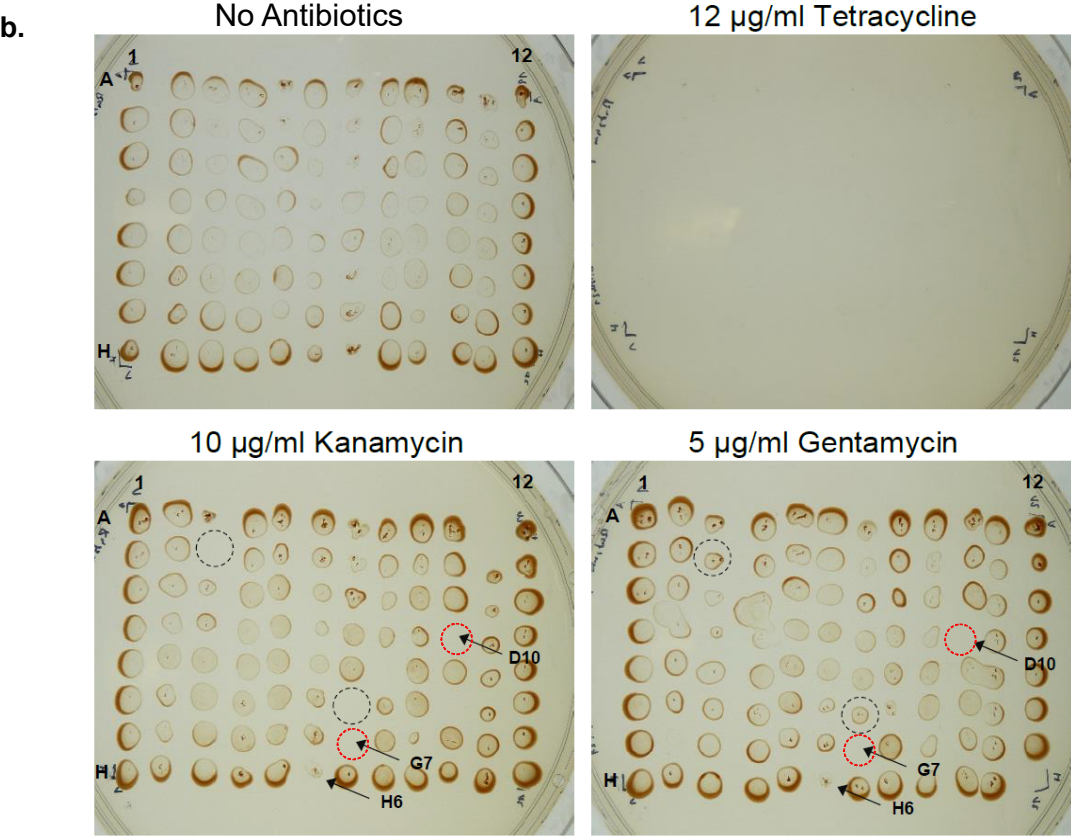

Supplementary Figure S5 Screening for G2-11  $\Delta$ MAI mutants. (a) PCR-screening of the transconjugants: (i) screening of the culture for the band indicating deletion in the clones with pCM157-P<sub>lac</sub> (left) and pCM157-P<sub>nir</sub> (right). (ii) Screening of the individual clones for (left to right): the band indicating deletion, the excision of the pAL plasmids from the flanking regions. (iii) Test for the presence of the magnetosome genes in the genome of the candidate  $\Delta$ MAI clones. The clones selected for further work are highlighted by yellow ellipses. (b) Replica-plating of the clones on agar plates with and without antibiotics. The selected mutants are highlighted in red punctuated circles.
